# Supplementary material for: Sol–gel emulsion synthesis of biphotonic core–shell nanoparticles based on lanthanide doped organic–inorganic hybrid materials
Source: Royal Society of Chemistry journal article supplement (doi:10.1039/c2jm15470f), 2012-01-01

## Supporting informations

### **Sol-Gel Emulsion Synthesis of Biphotonic Core-Shell Nanoparticles Based on Lanthanides Doped Organic-Inorganic Hybrid Materials**

Xianmin Guo,<sup>a</sup> Jean-Louis Canet,<sup>b,e</sup> Damien Boyer,<sup>\*a,c</sup> Arnaud Gautier<sup>\*b,f</sup> and Rachid Mahiou<sup>a,d</sup>

<sup>a</sup> Clermont Université, Université Blaise Pascal, Laboratoire des Matériaux Inorganiques, BP 10448, F-63000 Clermont-Ferrand, France.

<sup>b</sup> Clermont Université, Université Blaise Pascal, Laboratoire SEESIB, BP 10448, F-63000 Clermont-Ferrand, France. Fax: (+33) 473-40-77-17; Tel: (+33) 473-40-76-46; E-mail: Arnaud.Gautier@univ-bpclermont.fr.

<sup>c</sup> Clermont Université, ENSCCF, Laboratoire des Matériaux Inorganiques, BP 10448, F-63000 Clermont-Ferrand, France. Tel : +33 (0)4-73-40-76-47; Fax : +33 (0)4-73-40-71-08; E-mail : damien.boyer@ensccf.fr

<sup>d</sup> CNRS, UMR 6002, LMI, F-63177 Aubière, France.

<sup>e</sup> Clermont Université, ENSCCF, Laboratoire SEESIB, BP 10448, F-63000 Clermont-Ferrand, France.

<sup>f</sup> CNRS, UMR 6504, SEESIB, F-63177 Aubière, France.

**Scheme 1.** Summarized preparation of organic ligands (DPAE-OH, DPAE-Si) and corresponding core-shell nanoparticles  $\text{SiO}_2@ \text{Ln}(\text{DPAE-Si})_3$  and  $\text{SiO}_2@ \text{Ln}(\text{DPAE-Si})_3@ \text{NH}_2$  (Ln = Eu and Tb).

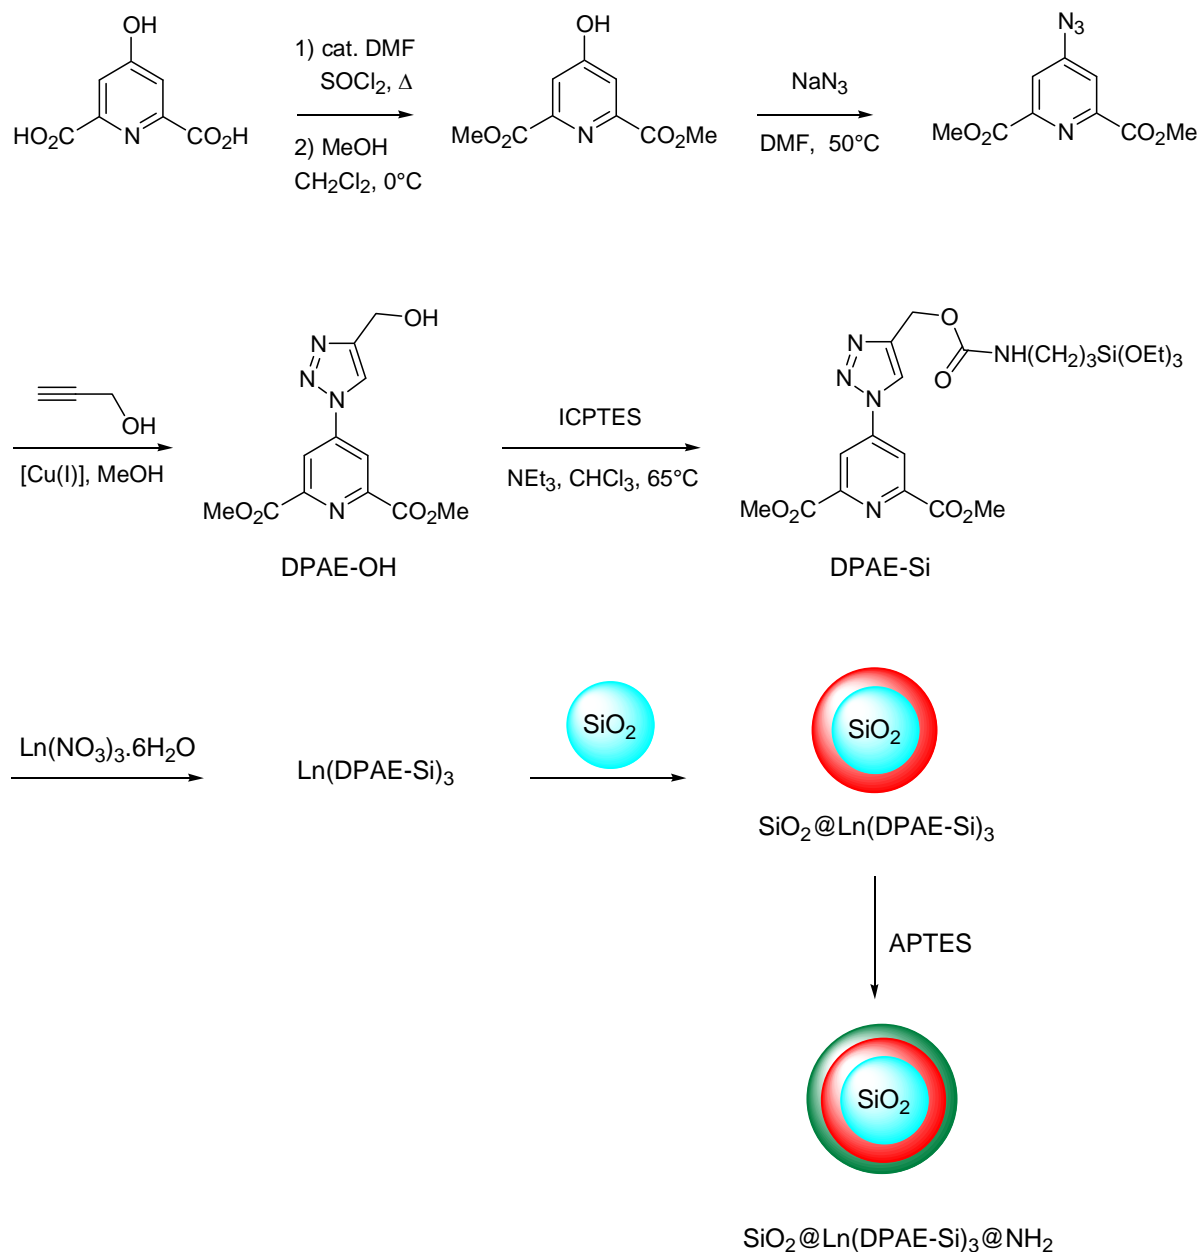

**Scheme 2.** Comparison between one photon (blue) and two photons (red) excitation mechanisms.

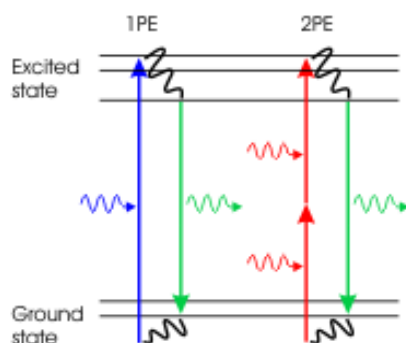

Supplement: c2jm15470f.pdf [file c2jm15470f.pdf]
